# Supplementary material for: Polymer Hydrogel Supported Ni/Pd Alloys for Hydrogen Gas Production from Hydrolysis of Dimethylamine Borane with a Long Recyclable Lifetime
Source: MDPI journal article supplement (doi:10.3390/polym14214647), 2022-11-01
Supplement: s1 [file s1]

# Polymer Hydrogel Supported Ni/Pd Alloys for Hydrogen Gas Production from Hydrolysis of Dimethylamine Borane with a Long Recyclable Lifetime

Hao-Kun Cai <sup>1,2</sup>, Zhong-Yi Jiang <sup>2</sup>, Siyuan Xu <sup>1</sup>, Ying Xu <sup>1</sup>, Ping Lu <sup>1</sup> and Jian Dong <sup>1,\*</sup>

<sup>1</sup> College of Chemistry and Chemical Engineering, Shaoxing University, Shaoxing 312000, China

<sup>2</sup> Ningbo Academy of Product and Food Quality Inspection (Ningbo Fiber Inspection Institute), Ningbo 315048, China

\* Correspondence: jiangdong@usx.edu.cn; Tel.: +86-575-88342511

Table S1. Confidence Intervals of Reaction Rates

Different samples in Figure 3 have different confidence intervals.

| Sample                           | pure Pd   | Ni/Pd 5:1 | Ni/Pd 10:1 | Ni/Pd 20:1 | Ni/Pd 30:1 | pure Ni   |
|----------------------------------|-----------|-----------|------------|------------|------------|-----------|
| reaction rate (ml/min)           | 1.08      | 1.37      | 1.68       | 2.46       | 1.75       | 1.09      |
| standard deviation (ml/min)      | 0.03      | 0.04      | 0.04       | 0.06       | 0.03       | 0.03      |
| 95% confidence interval (ml/min) | 1.01-1.15 | 1.29-1.46 | 1.59-1.78  | 2.34-2.59  | 1.68-1.83  | 1.02-1.17 |

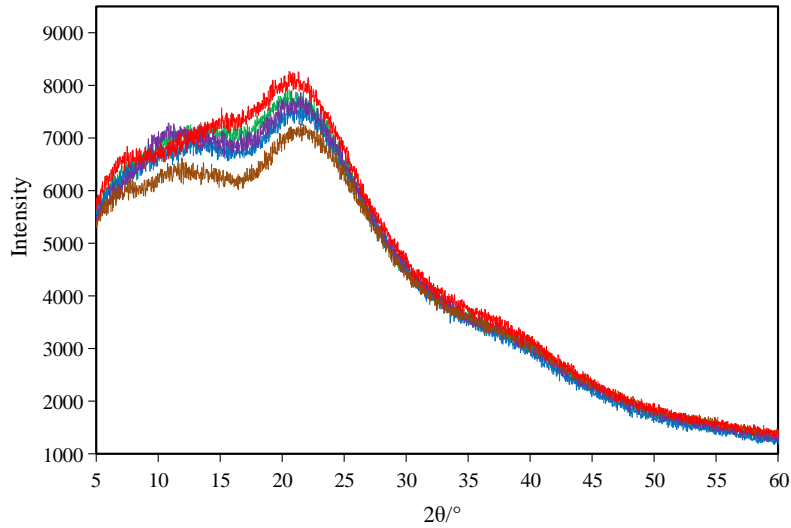

Figure S1. X-ray diffraction results of the hydrogels with various metal nanoparticles: (brown) pure Pd; (blue) PdNi with Pd/Ni=1/5; (purple) Pd/Ni =1/10; (green) Pd/Ni =1/20; (red) Pd/Ni =1/30.

The average size of metal crystallites are calculated by using the Scherrer formula,

$$D = K\lambda / (\beta \cos \theta),$$

where D is the crystallite grain size of the particle (nm),  $K = 0.94$ .

The wavelength of X-ray  $\lambda = 1.5418 \text{ \AA}$ .  $\Theta = 2\theta/2$ .

$\beta$  = the full width at half maximum intensity of the peak (in rad).

The samples all show broad diffraction peaks with  $2\theta = 22.65^\circ$ ,  $\beta = 8^\circ = 0.1397$ . Thus, the average size of metal crystallites  $D = 1.06 \text{ nm}$ .

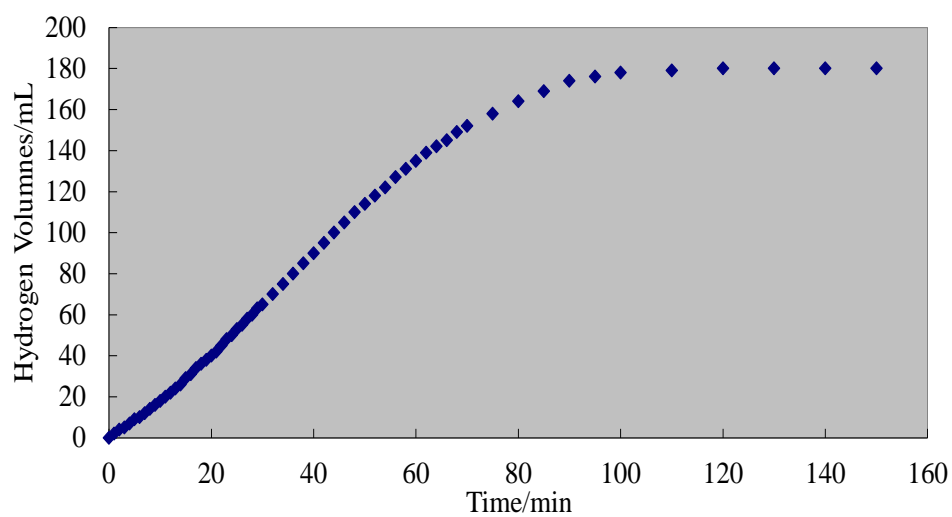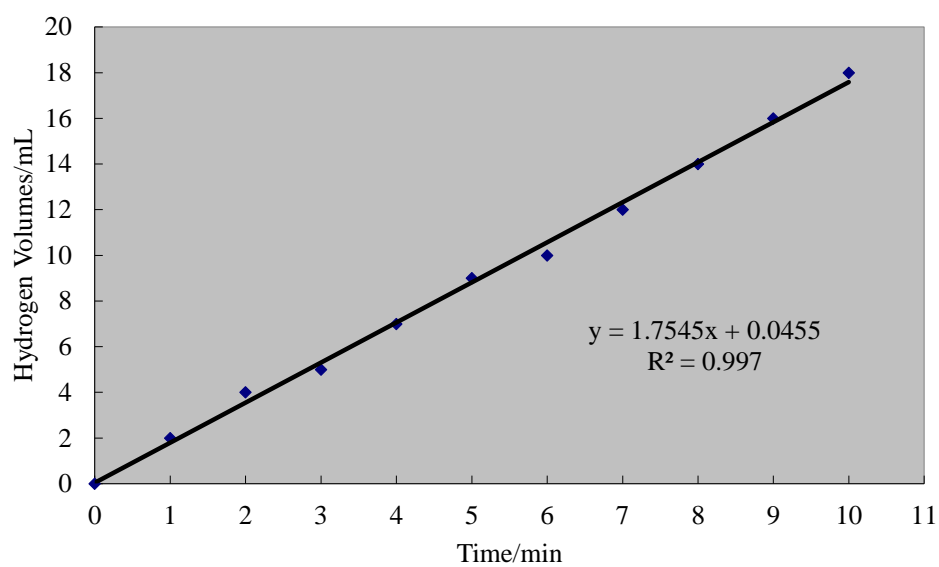

Figure S2. Representative volumes of hydrogen gas produced from Ni/Pd 30/1 with time over 160 min and the initial hydrogen volumes in the first 10 min.
